# Supplementary material for: Cancer-associated fibroblast secretion of PDGFC promotes gastrointestinal stromal tumor growth and metastasis
Source: PubMed Central journal article supplement (PMC7979540; doi:10.1038/s41388-021-01685-w), 2021-02-18
Supplement: 41388_2021_1685_MOESM2_ESM.pdf [file 41388_2021_1685_MOESM2_ESM.pdf]

**Supplementary Table 1. Reagent and Oligonucleotides**

| Reagent                                           | Source                              | Cat #        |
|---------------------------------------------------|-------------------------------------|--------------|
| <b>Antibodies</b>                                 |                                     |              |
| c-KIT (Ab 81, Mouse IgG1)                         | Santa Cruz                          | sc-13508     |
| c-KIT (Rabbit IgG)                                | Dako                                | A4502        |
| S100A4 (FSP1; D69C12, Rabbit IgG)                 | Abcam                               | ab41532      |
| TMEM16A (DOG1; DG/447, Mouse IgG)                 | Abcam                               | ab190721     |
| PDGFC (Rabbit IgG)                                | Abcam                               | ab93899      |
| SLUG (Mouse IgG)                                  | Abcam                               | ab51772      |
| Ki67 (Rabbit IgG)                                 | Abcam                               | ab15580      |
| Histone H3 (phosphor S10, Rabbit IgG)             | Abcam                               | ab47297      |
| Cleaved Caspase-3 (Rabbit IgG)                    | Abcam                               | ab2302       |
| PARP (Rabbit IgG)                                 | Cell Signaling                      | 9542S        |
| Phospho-PDGFR $\alpha$ (Y1018, Rabbit IgG)        | Cell Signaling                      | 4547P        |
| PDGFR $\alpha$ (Rabbit IgG)                       | Cell Signaling                      | 3164S        |
| Phospho-Akt (Ser473, Rabbit IgG)                  | Cell Signaling                      | 4060S        |
| Akt (40D4, Mouse IgG)                             | Cell Signaling                      | 9272S        |
| Phospho-p44/42 MAPK (T202/Y204, Rabbit IgG)       | Cell Signaling                      | 4370S        |
| p44/42 MAPK (Erk1/2, Mouse IgG)                   | Cell Signaling                      | 4696S        |
| Beta-actin (Rabbit IgG)                           | Cell Signaling                      | 4967S        |
| Alpha-tubulin (Mouse IgG)                         | Cell Signaling                      | 3873S        |
| Anti-Mouse IgG (H+L), Alexa Fluor 594 Conjugate   | Invitrogen                          | A21203       |
| Anti-Rabbit IgG (H+L), Alexa Fluor 488 Conjugate  | Invitrogen                          | A21206       |
| Anti-Mouse IgG (H+L), Alexa Fluor 488 Conjugate   | Invitrogen                          | A21202       |
| Anti-Rabbit IgG (H+L), Alexa Fluor 594 Conjugate  | Invitrogen                          | A21207       |
| Anti-Mouse IgG (H+L), HRP Conjugate               | Invitrogen                          | 65-6520      |
| Anti-Rabbit IgG (H+L), HRP Conjugate              | Invitrogen                          | 65-6120      |
| <b>Bacterial and Virus Strains</b>                |                                     |              |
| Human: PDGFR $\alpha$ shRNA lentivirus #1         | Dharmacon                           | V2LHS_58979  |
| Human: PDGFR $\alpha$ shRNA lentivirus #2         | Dharmacon                           | V2LHS_58980  |
| Human: PDGFC shRNA lentivirus #1                  | Dharmacon                           | V2LHS_97986  |
| Human: PDGFC shRNA lentivirus #2                  | Dharmacon                           | V3LHS_358099 |
| Human: SLUG (SNAI2) shRNA lentivirus #1           | Dharmacon                           | V2LHS_153126 |
| Human: SLUG (SNAI2) shRNA lentivirus #2           | Dharmacon                           | V2LHS_153128 |
| pGIPZ-IRES-tGFP                                   | Dharmacon                           | RHS4531      |
| psi-LVRU6MH-mCherry                               | GeneCopoeia                         | LVRU6MP      |
| <b>Biological Samples</b>                         |                                     |              |
| Tumor tissues                                     | Biorepository, Moores Cancer Center | IRB; #181755 |
| <b>Critical Reagents and Commercial Assays</b>    |                                     |              |
| PF-05212384 (Gedatolisib)                         | Sigma-Aldrich                       | PZ0281       |
| Imatinib (mesylate)                               | AdipoGen                            | SYN-1046     |
| Lipofectamine 3000 Reagent                        | Invitrogen                          | L3000015     |
| iQ <sup>TM</sup> SYBR <sup>®</sup> Green Supermix | BIO-RAD                             | 1708884      |
| Human recombinant PDGFC                           | MyBioSource                         | MBS651088    |
| PDGFC Human ELISA kit                             | MyBioSource                         | MBS701616    |

|                                                              |                     |                                                                   |
|--------------------------------------------------------------|---------------------|-------------------------------------------------------------------|
| ABC Universal PLUS Kit, Peroxidase                           | Vector Laboratories | PK-8200                                                           |
| <b>Oligonucleotides</b>                                      |                     |                                                                   |
| QPCR Primer PDGFC-Forward:<br>GGCTTCTCCTGCTGACATCT           | This paper          | N/A                                                               |
| QPCR Primer PDGFC-Reverse:<br>TCCGTTCTGTTCCCTTGTTGC          | This paper          | N/A                                                               |
| QPCR Primer PDGFRA-Forward:<br>CGCCGCTTCCTGATATTGAG          | This paper          | N/A                                                               |
| QPCR Primer PDGFRA-Reverse:<br>CTCCACGGTACTCCTGTCTC          | This paper          | N/A                                                               |
| QPCR Primer SNAI2 (SLUG)-Forward:<br>ATATTCGGACCCACACATTACCT | This paper          | N/A                                                               |
| QPCR Primer SNAI2 (SLUG)-Reverse:<br>GCAAATGCTCTGTTGCAGTGA   | This paper          | N/A                                                               |
| QPCR Primer N-cadherin-Forward:<br>AGCTTCTCACGGCATAACACC     | This paper          | N/A                                                               |
| QPCR Primer N-cadherin-Reverse:<br>GCTTGAGGGTCTGAATCTTGCT    | This paper          | N/A                                                               |
| QPCR Primer CCL2-Forward:<br>GCAGCAAGTGTCCTCAAAGAA           | This paper          | N/A                                                               |
| QPCR Primer CCL2-Reverse:<br>TCGGAGTTTGGGTTTGCTTG            | This paper          | N/A                                                               |
| QPCR Primer RAB3B-Forward:<br>AACTGCAGATCTGGGACACA           | This paper          | N/A                                                               |
| QPCR Primer RAB3B-Reverse:<br>ACACTTGTTCCCCACCAGAA           | This paper          | N/A                                                               |
| QPCR Primer TNC-Forward:<br>GAACCTGGTGTCTTCCCTGA             | This paper          | N/A                                                               |
| QPCR Primer TNC-Reverse:<br>AGACACAGCCACATCCTTCA             | This paper          | N/A                                                               |
| QPCR Primer GAPDH-Forward:<br>TCGACAGTCAGCCGCATCTTCTTT       | This paper          | N/A                                                               |
| QPCR Primer GAPDH-Reverse:<br>TACGACCAAATCCGTTGACTCCGA       | This paper          | N/A                                                               |
| <b>Software and Algorithms</b>                               |                     |                                                                   |
| ImageJ                                                       | NIH                 | <a href="https://imagej.nih.gov/ij">https://imagej.nih.gov/ij</a> |
| GraphPad Prism 5                                             | GraphPad Software   | N/A                                                               |
| BioVinci                                                     | BioTuring Inc       | N/A                                                               |
| Aperio ImageScope                                            | Leica Biosystems    | N/A                                                               |
| Sequencing data (RNA seq)                                    | This paper          | GSE143547                                                         |
