# Supplementary material for: Cancer-associated fibroblast secretion of PDGFC promotes gastrointestinal stromal tumor growth and metastasis
Source: PubMed Central journal article supplement (PMC7979540; doi:10.1038/s41388-021-01685-w), 2021-02-18
Supplement: 41388_2021_1685_MOESM3_ESM.pdf [file 41388_2021_1685_MOESM3_ESM.pdf]

Supplementary Table 2. The list of growth factors upregulated in GIST cell lines vs. CAFs

GIST cell lines vs. CAFs

| Gene    | Fold | q value  |
|---------|------|----------|
| FGF7    | 11.8 | >1.0E-50 |
| PDGFC   | 10.1 | >1.0E-50 |
| MEGF6   | 9.85 | >1.0E-50 |
| FGF9    | 9.28 | 3.47E-31 |
| TGFBI   | 8.91 | >1.0E-50 |
| FGF5    | 8.64 | >1.0E-50 |
| IGFBP6  | 8.30 | >1.0E-50 |
| IGFBP3  | 8.21 | 1.21E-15 |
| IGF1    | 7.57 | 6.36E-25 |
| PDGFD   | 6.65 | 1.64E-07 |
| TGFB2   | 6.57 | 5.53E-36 |
| FGF13   | 6.02 | 2.03E-14 |
| FGF11   | 5.75 | 1.39E-12 |
| IGFBPL1 | 5.33 | 2.76E-12 |
| FGF18   | 5.2  | 1.04E-10 |
