# Supplementary material for: Cancer-associated fibroblast secretion of PDGFC promotes gastrointestinal stromal tumor growth and metastasis
Source: PubMed Central journal article supplement (PMC7979540; doi:10.1038/s41388-021-01685-w), 2021-02-18
Supplement: 41388_2021_1685_MOESM4_ESM.pdf [file 41388_2021_1685_MOESM4_ESM.pdf]

**Supplementary Table 3. Drug screening using PI3K/mTOR inhibitors (n=38)**

| CompoundID  | Structure                                                                           | IC50 ( uM) | ResponseCurve                                                                       | CurveTop | CurveSlope |
|-------------|-------------------------------------------------------------------------------------|------------|-------------------------------------------------------------------------------------|----------|------------|
| SBI-0086700 | 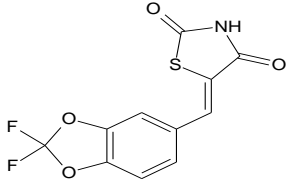   | > 2.00     |    |          |            |
| SBI-0050688 |    | > 2.00     |    |          |            |
| SBI-0051215 |    | > 2.00     |    |          |            |
| SBI-0654446 |   | > 2.00     |   |          |            |
| SBI-0207183 |  | > 2.00     |  |          |            |
| SBI-0654485 |  | > 2.00     |  |          |            |
| SBI-0023049 |  | > 2.00     |  |          |            |

| CompoundID  | Structure                                                                           | IC50 ( uM) |      | ResponseCurve                                                                                                                                                                                                    | CurveTop | CurveSlope |
|-------------|-------------------------------------------------------------------------------------|------------|------|------------------------------------------------------------------------------------------------------------------------------------------------------------------------------------------------------------------|----------|------------|
| SBI-0207184 | 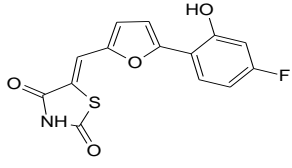   | >          | 2.00 | <p>SBI-0207184.P007<br/>%Purity= Exp_Max=0.84542</p>                                                                            |          |            |
| Gedatolisib |    |            | 0.15 | <p>SBI-0654417.P001<br/>%Purity= Exp_Max=51.622</p>  <p>Max = 47.54 Slope = 1.445<br/>Min = 0 IC50 = 0.1543<br/>R2 = 0.9655</p> | 47.50    | 1.44       |
| SBI-0207185 |    | >          | 2.00 | <p>SBI-0207185.P005<br/>%Purity= Exp_Max=4.8997</p>                                                                             |          |            |
| SBI-0086699 |   | >          | 2.00 | <p>SBI-0086699.P009<br/>%Purity= Exp_Max=4.5772</p>                                                                            |          |            |
| SBI-0654358 |  | >          | 2.00 | <p>SBI-0654358.P001<br/>%Purity= Exp_Max=2.5774</p>                                                                           |          |            |
| SBI-0654364 |  | >          | 2.00 | <p>SBI-0654364.P001<br/>%Purity= Exp_Max=10.409</p>                                                                           |          |            |
| SBI-0634490 |  | >          | 2.00 | <p>SBI-0634490.P005<br/>%Purity= Exp_Max=9.2558</p>                                                                           |          |            |

| CompoundID  | Structure | IC50 ( uM) |      | ResponseCurve | CurveTop | CurveSlope |
|-------------|-----------|------------|------|---------------|----------|------------|
| SBI-0654377 |           | >          | 2.00 |               |          |            |
| SBI-0654420 |           | >          | 2.00 |               |          |            |
| SBI-0207186 |           |            | 0.12 |               | 57.80    | 4.44       |
| SBI-0654454 |           |            | 0.10 |               | 47.80    | 1.75       |
| SBI-0654260 |           | >          | 2.00 |               |          |            |
| SBI-0654465 |           | >          | 2.00 |               |          |            |
| SBI-0654334 |           | >          | 2.00 |               |          |            |

| CompoundID  | Structure                                                                           | IC50 ( uM) |      | ResponseCurve                                                                                                                           | CurveTop | CurveSlope |
|-------------|-------------------------------------------------------------------------------------|------------|------|-----------------------------------------------------------------------------------------------------------------------------------------|----------|------------|
| SBI-0646961 | 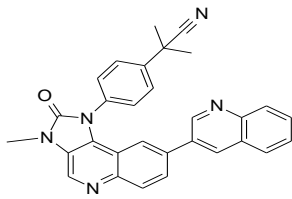   | >          | 2.00 | <p>SBI-0646961.P003<br/>%Purity= Exp_Max=28.931</p>    |          |            |
| SBI-0053458 |    | >          | 2.00 | <p>SBI-0053458.P007<br/>%Purity= Exp_Max=6.6176</p>    |          |            |
| SBI-0654346 |    | >          | 2.00 | <p>SBI-0654346.P001<br/>%Purity= Exp_Max=-2.0814</p>   |          |            |
| SBI-0654435 |   | >          | 2.00 | <p>SBI-0654435.P001<br/>%Purity= Exp_Max=10.068</p>   |          |            |
| SBI-0654438 |  | >          | 2.00 | <p>SBI-0654438.P001<br/>%Purity= Exp_Max=46.569</p>  |          |            |
| SBI-0654434 |  | >          | 2.00 | <p>SBI-0654434.P001<br/>%Purity= Exp_Max=43.389</p>  |          |            |
| SBI-0086698 |  | >          | 2.00 | <p>SBI-0086698.P006<br/>%Purity= Exp_Max=48.044</p>  |          |            |

| CompoundID  | Structure | IC50 ( uM) | ResponseCurve                                       | CurveTop | CurveSlope |
|-------------|-----------|------------|-----------------------------------------------------|----------|------------|
| SBI-0207178 |           | > 2.00     | <p>SBI-0207178.P005<br/>%Purity= Exp_Max=6.0024</p> |          |            |
| SBI-0654335 |           | > 2.00     | <p>SBI-0654335.P001<br/>%Purity= Exp_Max=32.047</p> |          |            |
| SBI-0654406 |           | > 2.00     | <p>SBI-0654406.P001<br/>%Purity= Exp_Max=29.329</p> |          |            |
| SBI-0654282 |           | > 2.00     | <p>SBI-0654282.P002<br/>%Purity= Exp_Max=8.5642</p> |          |            |
| SBI-0654401 |           | > 2.00     | <p>SBI-0654401.P001<br/>%Purity= Exp_Max=6.0924</p> |          |            |
| SBI-0654408 |           | > 2.00     | <p>SBI-0654408.0001<br/>%Purity= Exp_Max=3.9785</p> |          |            |
| SBI-0654410 |           | > 2.00     | <p>SBI-0654410.P001<br/>%Purity= Exp_Max=7.4296</p> |          |            |

| CompoundID  | Structure | IC50 ( uM) | ResponseCurve                                       | CurveTop | CurveSlope |
|-------------|-----------|------------|-----------------------------------------------------|----------|------------|
| SBI-0654414 |           | > 2.00     | <p>SBI-0654414.0003<br/>%Purity= Exp_Max=13.844</p> |          |            |
| SBI-0802188 |           | > 2.00     | <p>SBI-0802188.0001<br/>%Purity= Exp_Max=42.131</p> |          |            |
| SBI-0654479 |           | > 2.00     | <p>SBI-0654479.0001<br/>%Purity= Exp_Max=17.704</p> |          |            |
